# Supplementary material for: Metabolic Dependencies Underlie Interaction Patterns of Gut Microbiota During Enteropathogenesis
Source: Front Microbiol. 2019 Jun 4;10:1205. doi: 10.3389/fmicb.2019.01205 (PMC6558107; doi:10.3389/fmicb.2019.01205)
Supplement: Supplementary file 5 [file Table_5.XLS]

## Sheet: Table S5
Table S5: The recognition accuracy is between 45% and 75% for the three datasets (analyzed in different diet).
HF_twin	Species2	Name_S2	Mean_S2_changed	sum_influence	explained
1	Bacteroides fragilis YCH46	Bacteroides fragilis	-0.100656	-0.748963	Yes				explained
2	Bifidobacterium bifidum S17	Bifidobacterium bifidum	-1.1783	-1.91107	Yes			twin_HF	0.7272
3	Faecalibacterium prausnitzii SL3/3	Faecalibacterium prausnitzii	-1.21709	-0.777682	Yes			twin_W	0.6364
4	Roseburia intestinalis L1-82	Roseburia intestinalis	-3.55244	-12.6057	Yes			IBD10_HF	0.5312
5	Ruminococcus lactaris ATCC 29176	Ruminococcus lactaris	-1.68923	-2.08549	Yes			IBD10_W	0.6562
6	Streptococcus salivarius JIM8777	Streptococcus salivarius	-0.496971	-0.768217	Yes			CRC_HF	0.5238
7	Bifidobacterium pseudocatenulatum DSM 20438	Bifidobacterium pseudocatenulatum	3.65384	7.76976	Yes			CRC_W	0.4762
8	Eubacterium hallii L2-7	Eubacterium hallii	5.02897	23.2955	Yes
9	Dialister invisus DSM 15470	Dialister invisus	-1.68412	5.75426	No
10	Eubacterium siraeum DSM 15702	Eubacterium siraeum	-0.497634	1.49438	No
11	Ruminococcus gnavus ATCC 29149	Ruminococcus gnavus	2.78227	-2.65028	No
W_twin	Species2	Name_S2	Mean_S2_changed	sum_influence	explained
1	Bacteroides fragilis YCH46	Bacteroides fragilis	-0.100656	-1.25331	Yes
2	Eubacterium siraeum DSM 15702	Eubacterium siraeum	-0.497634	-4.54543	Yes
3	Faecalibacterium prausnitzii SL3/3	Faecalibacterium prausnitzii	-1.21709	-2.2532	Yes
4	Roseburia intestinalis L1-82	Roseburia intestinalis	-3.55244	-19.4492	Yes
5	Streptococcus salivarius JIM8777	Streptococcus salivarius	-0.496971	-2.00404	Yes
6	Bifidobacterium pseudocatenulatum DSM 20438	Bifidobacterium pseudocatenulatum	3.65384	7.6465	Yes
7	Eubacterium hallii L2-7	Eubacterium hallii	5.02897	1.72252	Yes
8	Bifidobacterium bifidum S17	Bifidobacterium bifidum	-1.1783	1.64363	No
9	Dialister invisus DSM 15470	Dialister invisus	-1.68412	15.6666	No
10	Ruminococcus gnavus ATCC 29149	Ruminococcus gnavus	2.78227	-3.83245	No
11	Ruminococcus lactaris ATCC 29176	Ruminococcus lactaris	-1.68923	0.316787	No
HF_IBD10	Species2	Name_S2	Mean_S2_changed	sum_influence	explained
1	Bacteroides coprocola M16, DSM 17136	Bacteroides coprocola	-3.57212	-0.719353	Yes
2	Bacteroides dorei DSM 17855	Bacteroides dorei	-1.32396	-0.978293	Yes
3	Bacteroides eggerthii DSM 20697	Bacteroides eggerthii	-1.41339	-11.3291	Yes
4	Bacteroides massiliensis B846dnLKV334 = Timone 84634 = DSM 17679 = JCM 13223	Bacteroides massiliensis	-3.49609	-4.43798	Yes
5	Bacteroides stercoris ATCC 43183	Bacteroides stercoris	-1.52742	-7.13325	Yes
6	Eubacterium eligens ATCC 27750	Eubacterium eligens	-0.83989	-135.115	Yes
7	Eubacterium siraeum DSM 15702	Eubacterium siraeum	-2.50981	-3.41127	Yes
8	Parabacteroides johnsonii DSM 18315	Parabacteroides johnsonii	-0.78828	-2.33404	Yes
9	Paraprevotella clara YIT 11840	Paraprevotella clara	-0.423622	-12.3275	Yes
10	Roseburia inulinivorans DSM 16841	Roseburia inulinivorans	-0.907613	-18.0354	Yes
11	Ruminococcus champanellensis 18P13	Ruminococcus champanellensis	-0.920242	-10.8925	Yes
12	Ruminococcus lactaris ATCC 29176	Ruminococcus lactaris	-0.126942	-11.2944	Yes
13	Bacteroides salyersiae WAL 10018 = DSM 18765 = JCM 12988	Bacteroides salyersiae	0.334319	5.73536	Yes
14	Escherichia coli UTI89 (UPEC)	Escherichia coli	0.370302	0.0720071	Yes
15	Klebsiella pneumoniae pneumoniae MGH78578	Klebsiella pneumoniae	3.72493	8.12977	Yes
16	Methanobrevibacter smithii ATCC 35061	Methanobrevibacter smithii	1.19967	34.7214	Yes
17	Veillonella ratti ACS-216-V-Col6b	Veillonella ratti	0.334327	1.59259	Yes
18	Alistipes indistinctus YIT 12060	Alistipes indistinctus	-0.415686	2.12411	No
19	Alistipes putredinis DSM 17216	Alistipes putredinis	-2.01588	4.75898	No
20	Alistipes shahii WAL 8301	Alistipes shahii	-0.678616	1.59591	No
21	Bacteroides coprophilus DSM 18228	Bacteroides coprophilus	-0.511316	5.26018	No
22	Barnesiella intestinihominis YIT 11860	Barnesiella intestinihominis	-0.593047	4.44044	No
23	Bifidobacterium adolescentis ATCC 15703	Bifidobacterium adolescentis	0.41545	-25.8731	No
24	Collinsella aerofaciens ATCC 25986	Collinsella aerofaciens	-0.626189	24.3751	No
25	Dialister invisus DSM 15470	Dialister invisus	-2.30648	14.0209	No
26	Eubacterium hallii L2-7	Eubacterium hallii	-0.368811	85.939	No
27	Eubacterium ventriosum ATCC 27560	Eubacterium ventriosum	-0.36515	3.25474	No
28	Faecalibacterium prausnitzii SL3/3	Faecalibacterium prausnitzii	-6.36723	3.76829	No
29	Parabacteroides distasonis ATCC 8503	Parabacteroides distasonis	1.09623	-13.6328	No
30	Parabacteroides goldsteinii dnLKV18	Parabacteroides goldsteinii	6.19419	-2.26556	No
31	Parabacteroides merdae ATCC 43184	Parabacteroides merdae	-0.699009	4.48547	No
32	Roseburia hominis A2-183	Roseburia hominis	-0.785722	199.8	No
W_IBD10	Species2	Name_S2	Mean_S2_changed	sum_influence	explained
1	Alistipes indistinctus YIT 12060	Alistipes indistinctus	-0.415686	-3.1342	Yes
2	Alistipes putredinis DSM 17216	Alistipes putredinis	-2.01588	-5.20641	Yes
3	Bacteroides dorei DSM 17855	Bacteroides dorei	-1.32396	-1.69775	Yes
4	Bacteroides eggerthii DSM 20697	Bacteroides eggerthii	-1.41339	-18.5017	Yes
5	Bacteroides massiliensis B846dnLKV334 = Timone 84634 = DSM 17679 = JCM 13223	Bacteroides massiliensis	-3.49609	-2.65703	Yes
6	Bacteroides stercoris ATCC 43183	Bacteroides stercoris	-1.52742	-12.1608	Yes
7	Eubacterium eligens ATCC 27750	Eubacterium eligens	-0.83989	-20.7445	Yes
8	Eubacterium hallii L2-7	Eubacterium hallii	-0.368811	-15.5774	Yes
9	Eubacterium siraeum DSM 15702	Eubacterium siraeum	-2.50981	-17.0299	Yes
10	Faecalibacterium prausnitzii SL3/3	Faecalibacterium prausnitzii	-6.36723	-7.10052	Yes
11	Parabacteroides johnsonii DSM 18315	Parabacteroides johnsonii	-0.78828	-0.187989	Yes
12	Paraprevotella clara YIT 11840	Paraprevotella clara	-0.423622	-17.5752	Yes
13	Roseburia hominis A2-183	Roseburia hominis	-0.785722	-19.3721	Yes
14	Roseburia inulinivorans DSM 16841	Roseburia inulinivorans	-0.907613	-26.3408	Yes
15	Ruminococcus champanellensis 18P13	Ruminococcus champanellensis	-0.920242	-14.7686	Yes
16	Ruminococcus lactaris ATCC 29176	Ruminococcus lactaris	-0.126942	-15.5968	Yes
17	Bacteroides salyersiae WAL 10018 = DSM 18765 = JCM 12988	Bacteroides salyersiae	0.334319	5.70301	Yes
18	Escherichia coli UTI89 (UPEC)	Escherichia coli	0.370302	0.86475	Yes
19	Klebsiella pneumoniae pneumoniae MGH78578	Klebsiella pneumoniae	3.72493	10.0602	Yes
20	Methanobrevibacter smithii ATCC 35061	Methanobrevibacter smithii	1.19967	43.3222	Yes
21	Veillonella ratti ACS-216-V-Col6b	Veillonella ratti	0.334327	9.69167	Yes
22	Alistipes shahii WAL 8301	Alistipes shahii	-0.678616	2.11186	No
23	Bacteroides coprocola M16, DSM 17136	Bacteroides coprocola	-3.57212	6.78633	No
24	Bacteroides coprophilus DSM 18228	Bacteroides coprophilus	-0.511316	7.37732	No
25	Barnesiella intestinihominis YIT 11860	Barnesiella intestinihominis	-0.593047	5.79031	No
26	Bifidobacterium adolescentis ATCC 15703	Bifidobacterium adolescentis	0.41545	-36.1233	No
27	Collinsella aerofaciens ATCC 25986	Collinsella aerofaciens	-0.626189	16.4359	No
28	Dialister invisus DSM 15470	Dialister invisus	-2.30648	35.24	No
29	Eubacterium ventriosum ATCC 27560	Eubacterium ventriosum	-0.36515	9.03387	No
30	Parabacteroides distasonis ATCC 8503	Parabacteroides distasonis	1.09623	-21.9585	No
31	Parabacteroides goldsteinii dnLKV18	Parabacteroides goldsteinii	6.19419	-2.97714	No
32	Parabacteroides merdae ATCC 43184	Parabacteroides merdae	-0.699009	1.2111	No
HF_CRC	Species2	Name_S2	Mean_S2_changed	sum_influence	explained
1	Bifidobacterium longum NCC2705	Bifidobacterium longum	-1.62919	-4.73402	Yes
2	Dorea formicigenerans ATCC 27755	Dorea formicigenerans	-0.0871772	-0.649759	Yes
3	Eubacterium eligens ATCC 27750	Eubacterium eligens	-1.46261	-113.12	Yes
4	Eubacterium rectale M104/1	Eubacterium rectale	-2.87185	-23.515	Yes
5	Roseburia intestinalis L1-82	Roseburia intestinalis	-1.29514	-25.7889	Yes
6	Ruminococcus bromii L2-63	Ruminococcus bromii	-3.99466	-27.8184	Yes
7	Streptococcus salivarius JIM8777	Streptococcus salivarius	-0.942758	-1.50571	Yes
8	Alistipes onderdonkii DSM 19147	Alistipes onderdonkii	1.19606	5.44836	Yes
9	Escherichia coli UTI89 (UPEC)	Escherichia coli	1.30356	5.36664	Yes
10	Eubacterium cylindroides T2-87	Eubacterium cylindroides	0.558523	11.6801	Yes
11	Odoribacter splanchnicus 1651/6, DSM 20712	Odoribacter splanchnicus	0.802895	9.00842	Yes
12	Bacteroides fragilis YCH46	Bacteroides fragilis	0.846392	-0.382442	No
13	Bacteroides plebeius M12, DSM 17135	Bacteroides plebeius	-1.03015	5.40961	No
14	Bifidobacterium bifidum S17	Bifidobacterium bifidum	0.814242	-10.5039	No
15	Bifidobacterium pseudocatenulatum DSM 20438	Bifidobacterium pseudocatenulatum	-0.709306	3.40737	No
16	Coprococcus comes ATCC 27758	Coprococcus comes	-0.458502	4.10198	No
17	Dialister invisus DSM 15470	Dialister invisus	-0.8481	6.37022	No
18	Eubacterium hallii L2-7	Eubacterium hallii	-0.87138	37.4252	No
19	Eubacterium ventriosum ATCC 27560	Eubacterium ventriosum	-0.564488	0.138373	No
20	Fusobacterium gonidiaformans ATCC 25563	Fusobacterium gonidiaformans	0.873704	-2.86001	No
21	Streptococcus thermophilus LMG 18311	Streptococcus thermophilus	-1.83737	17.0052	No
W_CRC	Species2	Name_S2	Mean_S2_changed	sum_influence	explained
1	Bifidobacterium longum NCC2705	Bifidobacterium longum	-1.62919	-5.03795	Yes
2	Eubacterium eligens ATCC 27750	Eubacterium eligens	-1.46261	-16.8378	Yes
3	Eubacterium hallii L2-7	Eubacterium hallii	-0.87138	-11.6148	Yes
4	Eubacterium rectale M104/1	Eubacterium rectale	-2.87185	-23.8838	Yes
5	Roseburia intestinalis L1-82	Roseburia intestinalis	-1.29514	-34.3818	Yes
6	Ruminococcus bromii L2-63	Ruminococcus bromii	-3.99466	-30.0953	Yes
7	Streptococcus salivarius JIM8777	Streptococcus salivarius	-0.942758	-3.86325	Yes
8	Alistipes onderdonkii DSM 19147	Alistipes onderdonkii	1.19606	6.47361	Yes
9	Escherichia coli UTI89 (UPEC)	Escherichia coli	1.30356	6.66218	Yes
10	Eubacterium cylindroides T2-87	Eubacterium cylindroides	0.558523	11.5776	Yes
11	Bacteroides fragilis YCH46	Bacteroides fragilis	0.846392	-2.45528	No
12	Bacteroides plebeius M12, DSM 17135	Bacteroides plebeius	-1.03015	6.40622	No
13	Bifidobacterium bifidum S17	Bifidobacterium bifidum	0.814242	-10.3292	No
14	Bifidobacterium pseudocatenulatum DSM 20438	Bifidobacterium pseudocatenulatum	-0.709306	8.36424	No
15	Coprococcus comes ATCC 27758	Coprococcus comes	-0.458502	5.43497	No
16	Dialister invisus DSM 15470	Dialister invisus	-0.8481	20.1772	No
17	Dorea formicigenerans ATCC 27755	Dorea formicigenerans	-0.0871772	0.482923	No
18	Eubacterium ventriosum ATCC 27560	Eubacterium ventriosum	-0.564488	8.57673	No
19	Fusobacterium gonidiaformans ATCC 25563	Fusobacterium gonidiaformans	0.873704	-6.35566	No
20	Odoribacter splanchnicus 1651/6, DSM 20712	Odoribacter splanchnicus	0.802895	-4.47206	No
21	Streptococcus thermophilus LMG 18311	Streptococcus thermophilus	-1.83737	12.1238	No
